# Supplementary material
Source: PubMed Central journal article supplement (PMC356976)

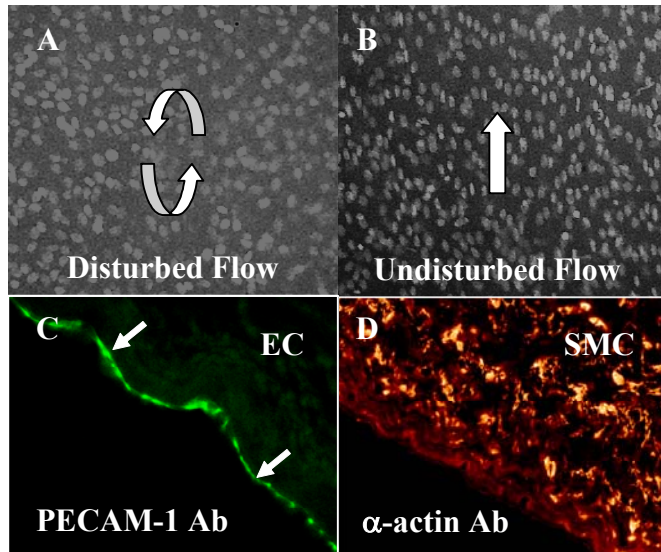

Supplement: pnas_0305938101_3.pdf [file pnas_0305938101_3.pdf]

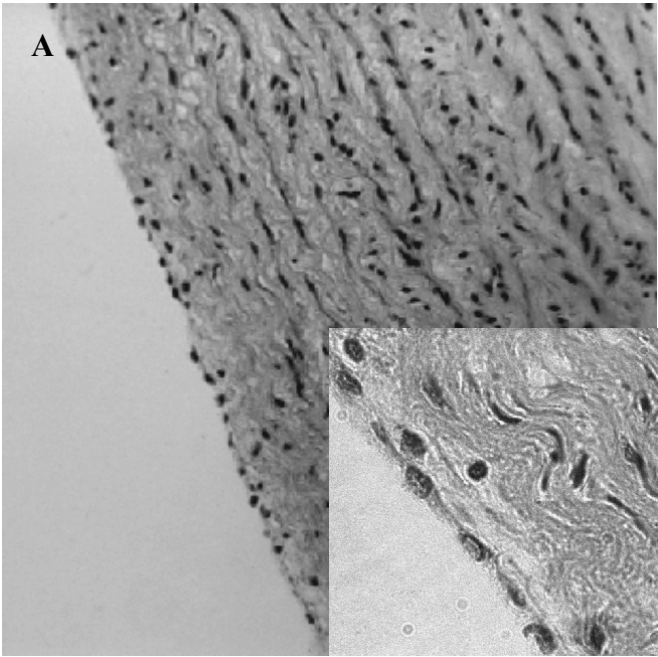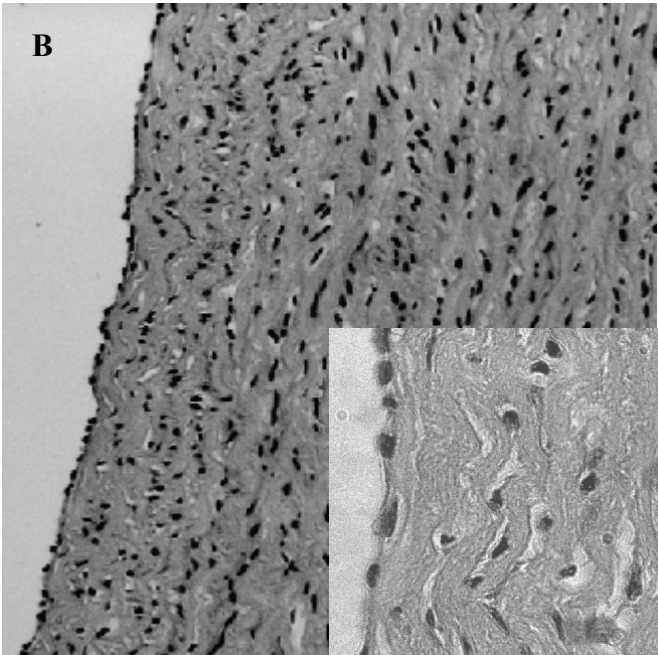

Supplement: pnas_0305938101_5.pdf [file pnas_0305938101_5.pdf]
